# Supplementary material for: Comprehensive transcriptional landscape of aging mouse liver
Source: PubMed Central journal article supplement (PMC4636074; doi:10.1186/s12864-015-2061-8), 2015-11-05

# Supplemental Figure S1

A

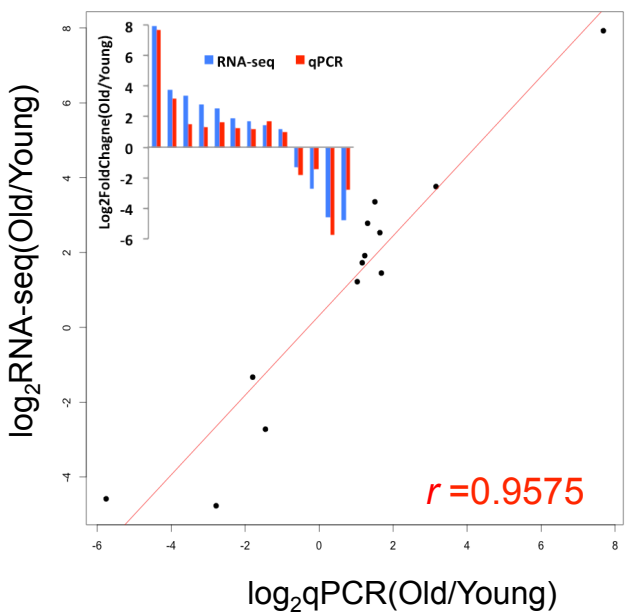

B

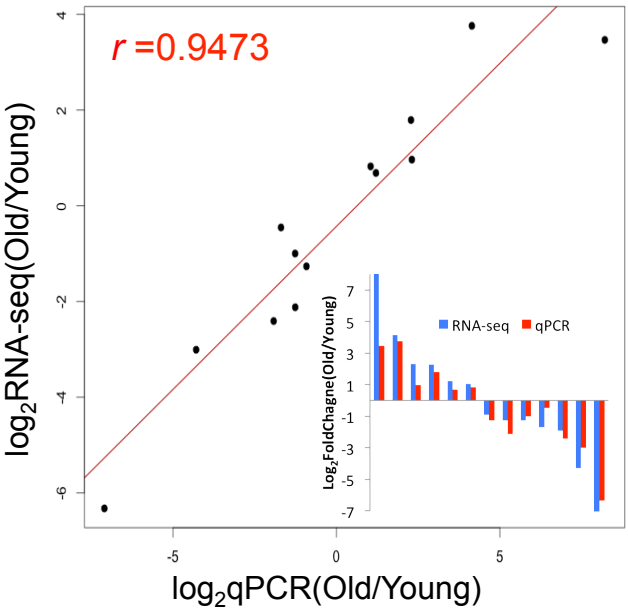

Supplement: 12864_2015_2061_MOESM7_ESM.pdf [file 12864_2015_2061_MOESM7_ESM.pdf]
